# Supplementary material for: The c.429_452 duplication of the ARX gene: a unique developmental-model of limb kinetic apraxia
Source: PubMed Central journal article supplement (PMC4016261; doi:10.1186/1750-1172-9-25), 2014-02-14
Supplement: 1750-1172-9-25-S7.pdf [file 1750-1172-9-25-S7.pdf]

**Table 3: Kinematic results**

|                                          | Movement duration (ms)       | Transport component        |                                |                            |                                | Grasp component              |                              |
|------------------------------------------|------------------------------|----------------------------|--------------------------------|----------------------------|--------------------------------|------------------------------|------------------------------|
|                                          |                              | Acceleration peak          |                                | Velocity peak              |                                | MGA                          |                              |
|                                          |                              | Latency (ms)               | Amplitude (mm/s <sup>2</sup> ) | Latency (ms)               | Amplitude (mm/s <sup>2</sup> ) | Latency (ms)                 | Amplitude (mm)               |
| Healthy controls                         | 800                          | 220                        | 4668                           | 341                        | 853                            | 568                          | 90.37                        |
| DS                                       | 988                          | 259                        | 3180                           | 383                        | 701                            | 683                          | 89.09                        |
| ARX                                      | 1284                         | 326                        | 2785                           | 473                        | 670                            | 978                          | 89.98                        |
| <b>Group effect</b>                      | [F(2,32)=10.6, p<0.001]****  | [F(2,32)=9.2, p<0.001]**** | [F(2,32)=6, p<0.01]**          | [F(2,32)=9.8, p<0.001]**** | [F(2,32)=3.5, p<0.05]*         | [F(2,32)=11.3, p<0.001]****  | NS                           |
| ARX/healthy controls                     | p<0.001****                  | p<0.001****                | p<0.01**                       | p<0.001****                | p<0.05*                        | p<0.001****                  |                              |
| ARX/DS                                   | p<0.01**                     | p<0.01**                   | NS                             | p<0.01**                   | NS                             | p<0.005***                   |                              |
| DS/healthy controls                      | NS                           | NS                         | p<0.05*                        | NS                         | p<0.05*                        | NS                           |                              |
| <b>Orientation effect</b>                | [F(1,32)=31.3, p<0.0001]**** | NS                         | [F(1,32)=4, p<0.05]*           | NS                         | [F(1,32)=16, p<0.0005]****     | [F(1,32)=17.2, p<0.0005]**** | [F(1,32)=45.6, p<0.0001]**** |
| <b>[Orientation*group] interaction</b>   | NS                           | NS                         | [F(2,32)=3.5, p<0.05]*         | NS                         | NS                             | NS                           | NS                           |
| Healthy controls                         | [F(1,12)=20.7, p<0.001]****  | NS                         | [F(1,12)=7, p<0.05]*           | NS                         | [F(1,12)=18.8, p<0.001]****    | [F(1,12)=37, p<0.001]****    | [F(1,12)=106, p<0.001]****   |
| DS                                       | [F(1,12)=32.3, p<0.0001]**** | NS                         | [F(1,12)=6.3, p<0.05]*         | NS                         | [F(1,12)=7, p<0.05]*           | [F(1,12)=9.9, p<0.01]**      | [F(1,12)=43, p<0.001]****    |
| ARX                                      | [F(1,8)=5.3, p<0.05]*        | NS                         | NS                             | NS                         | NS                             | NS                           | NS                           |
| <b>Type of pinch effect</b>              | [F(2,64)=8.1, p<0.001]****   | NS                         | NS                             | NS                         | NS                             | [F(2,64)=14.9, p<0.0001]**** | [F(2,64)=7.8, p<0.001]****   |
| <b>[Type of pinch*group] interaction</b> | [F(4,64)=3.1, p=0.02]*       | NS                         | NS                             | NS                         | [F(4,64)=2.8, p=0.03]*         | [F(4,64)=7.1, p<0.001]****   | NS                           |
| Healthy controls                         | NS                           | NS                         | NS                             | NS                         | NS                             | [F(2,24)=4.4, p<0.05]*       | [F(2,24)=9.23, p<0.005]**    |
| DS                                       | NS                           | NS                         | NS                             | NS                         | NS                             | NS                           | F(2,24)=3.01, p<0.06]        |
| ARX                                      | [F(2,16)=3.3, p=0.06]        | NS                         | NS                             | NS                         | [F(2,16)=3.6, p=0.049]*        | [F(2,16)=9.4, p<0.005]****   | NS                           |

NS: Non Significant; \* means <0.05, \*\* means <0.01, \*\*\* means <0.005 and \*\*\*\* means <0.001

Kinematic parameters were analyzed within each group (ARX, DS, and Healthy Controls) using a repeated measure ANOVA with two within group factors: type of pinch and orientation. A between group analysis was also performed. Post-hoc analysis was performed using a Newman-Keuls test.
